# Supplementary material
Source: HighWire-hosted journal article supplement (https://diabetesjournals.org/crawlprevention/governor?content=%2fNotFound%3f404%3bhttp%3a%2f%2fdiabetesjournals.org%3a80%2fhighwire%2ffilestream%2f46866%2ffield_highwire_adjunct_files%2f0%2fonlineappendix.pdf)
Supplement: governor [file governor]

Validate User


We are sorry, but we are experiencing unusual traffic at this time. Please help us confirm that you are not a robot and we will take you to your content.

Could not validate captcha. Please try again.

Take me to my Content
